# Supplementary material for: The nucleocytoplasmic translocation and up-regulation of ING5 protein in breast cancer: a potential target for gene therapy
Source: PubMed Central journal article supplement (PMC5669862; doi:10.18632/oncotarget.17918), 2017-05-17
Supplement: oncotarget-08-81953-s001.pdf [file oncotarget-08-81953-s001.pdf]

## The nucleocytoplasmic translocation and up-regulation of ING5 protein in breast cancer: a potential target for gene therapy

### Supplementary Materials

**Supplementary Table 1: Primers employed in the present study**

| Names             | Primer's sequence                                                      | Distribution                | AT(oC) | Product size (bp) | Extension time (s) |
|-------------------|------------------------------------------------------------------------|-----------------------------|--------|-------------------|--------------------|
| <i>E-cadherin</i> | F:5'-CCGCCATCGCTTACA-3'<br>R:5'-GGCACCTGACCCTTGTA-3'                   | NM-057374.2<br>1017-1278    | 60     | 262               | 34                 |
| <i>N-cadherin</i> | F:5'-GAAAGACCCATCCACG- 3'<br>R: 5'-CCTGCTCACCACCACTA- 3'               | NM-031333.1<br>2365-2581    | 60     | 217               | 34                 |
| <i>MMP-2</i>      | F:5'- TGATCTTGACCAGAATACCATCGA- 3'<br>R: 5'- GGCTTGCGAGGGAAGAAGTT - 3' | XM_004057658.2<br>429-518   | 60     | 94                | 34                 |
| <i>MMP-9</i>      | F:5'- TGTACCGCTATGGTTACT - 3'<br>R: 5'- CCTCAAAGGTTTGAAT - 3'          | NM_004994.2<br>169-353      | 60     | 189               | 34                 |
| <i>Zeb1</i>       | F:5'- GCTTGTGATTTGTGTGACAAGA - 3'<br>R: 5'-AATCGCATGTGTTCAATCAA - 3'   | XM_017016603.1<br>6160-6305 | 60     | 146               | 34                 |
| <i>Zeb2</i>       | F:5'- TCTGCGACATAAATACGA- 3'<br>R: 5'- GAGTGAAGCCTTGAGTGC- 3'          | XM_019022312.1<br>3189-3296 | 60     | 108               | 34                 |
| <i>Snail</i>      | F:5'-GGCTCAGTTCGTAAAGG-3'<br>R:5'-GCAGCGGTAGTCCACA-3'                  | NM-001032543.17-<br>363     | 60     | 357               | 34                 |
| <i>Slug</i>       | F:5'-ATGCCTGTCATACCACAA-3'<br>R: 5'-GAGGAGGTGTCAGATGGA-3'              | FBgn0028564<br>290-462      | 60     | 173               | 34                 |
| <i>VEGF</i>       | F:5'- GCGCTCGGTGCTGGAATTTG -3'<br>R: 5'- TAGAGCAATCTCCCAAGCCG -3'      | XM_016955597.1<br>138-298   | 60     | 161               | 34                 |
| <i>β-catenin</i>  | F:5'- GCTTGGAATGAGACTGCTGA -3'<br>R: 5'- CTGGCCATATCCACCAGAGT -3'      | X87838<br>2221-2334         | 60     | 114               | 34                 |
| <i>NF-κB</i>      | F:5'- GTGGACTACCTGGTGCCTCTA -3'<br>R: 5'- GTCCTTGGGTCCAGCAGTT -3'      | XM_011532006.2<br>437-630   | 60     | 194               | 34                 |
| <i>Cyclin E</i>   | F: 5'-GGATGTTGACTGCCTTGA-3'<br>R: 5'-CGCACCCTGATACCCT-3'               | BA000005<br>1044-1150       | 60     | 107               | 34                 |
| <i>p21</i>        | F: 5'-ACTGTCTTGTACCCTTGTGCC-3'<br>R: 5'-AAATCTGTCATGCTGGTCTGC-3'       | XM_003950827<br>572-679     | 60     | 108               | 34                 |
| <i>BRMS1</i>      | F: 5'- CTGTCCAGCCTCCAAGCAAAG-3'<br>R: 5'- TCTAGGTCCAGCATCTCACTGAC-3'   | XM_001171301.4<br>278-476   | 60     | 199               | 34                 |
| <i>GST-π</i>      | F: 5'- CGGGCAAGGATGACTATGTGA -3'<br>R: 5'- GGGCTAGGACCTCATGGATCA -3'   | BC044846.1<br>1137-1475     | 60     | 339               | 34                 |
| <i>ING5</i>       | F: 5'- CAAGGAATACAGTGACGACAA -3'<br>R: 5'- AAAATCACTGCCCTCCATC -3'     | NM_001330162.1<br>272-407   | 60     | 136               | 34                 |
| <i>GAPDH</i>      | F: 5'-CAATGACCCCTTCATTGACC-3'<br>R: 5'- TGGAAGATGGTGTGGGATT-3'         | NM_002046.3<br>201-335      | 60     | 135               | 34                 |

AT = annealing temperature.

**Supplementary Table 2: The antibodies used in the present study**

| <b>Names</b>      | <b>Source</b> | <b>Company</b>            |
|-------------------|---------------|---------------------------|
| GAPDH             | Rabbit        | Wanleibio                 |
| ING5              | Rabbit        | Proteintech Biotech. Inc. |
| E-Cadherin        | Rabbit        | Abcam                     |
| N-Cadherin        | Mouse         | Abcam                     |
| Twist             | Rabbit        | Wanleibio                 |
| Snail             | Rabbit        | Wanleibio                 |
| Zeb1              | Rabbit        | Wanleibio                 |
| Slug              | Rabbit        | Abcam                     |
| VEGF              | Rabbit        | Santa Cruz Biotech. Inc.  |
| Claudin-1         | Mouse         | Santa Cruz Biotech. Inc.  |
| p-NF- $\kappa$ B  | Rabbit        | Santa Cruz Biotech. Inc.  |
| p-Akt             | Rabbit        | Santa Cruz Biotech. Inc.  |
| Akt               | Rabbit        | Santa Cruz Biotech. Inc.  |
| p53               | Rabbit        | Wanleibio                 |
| Cdk4 (C-22)       | Rabbit        | Santa Cruz Biotech. Inc.  |
| Cyclin D1 (H-295) | Rabbit        | Santa Cruz Biotech. Inc.  |
| Cdc2 (B-6)        | Mouse         | Santa Cruz Biotech. Inc.  |
| Cyclin B1 (GNS1)  | Mouse         | Santa Cruz Biotech. Inc.  |
| c-myc (9E10)      | Mouse         | Santa Cruz Biotech. Inc.  |
| AIF(E-1)          | Mouse         | Santa Cruz Biotech. Inc.  |
| ADFP              | Rabbit        | Abcam                     |
| FBXW7             | Rabbit        | Wanleibio                 |
| MRP               | Mouse         | Abcam                     |
